# Supplementary material for: SNP arrays: comparing diagnostic yields for four platforms in children with developmental delay
Source: PubMed Central journal article supplement (PMC4299176; doi:10.1186/s12920-014-0070-0), 2014-12-24

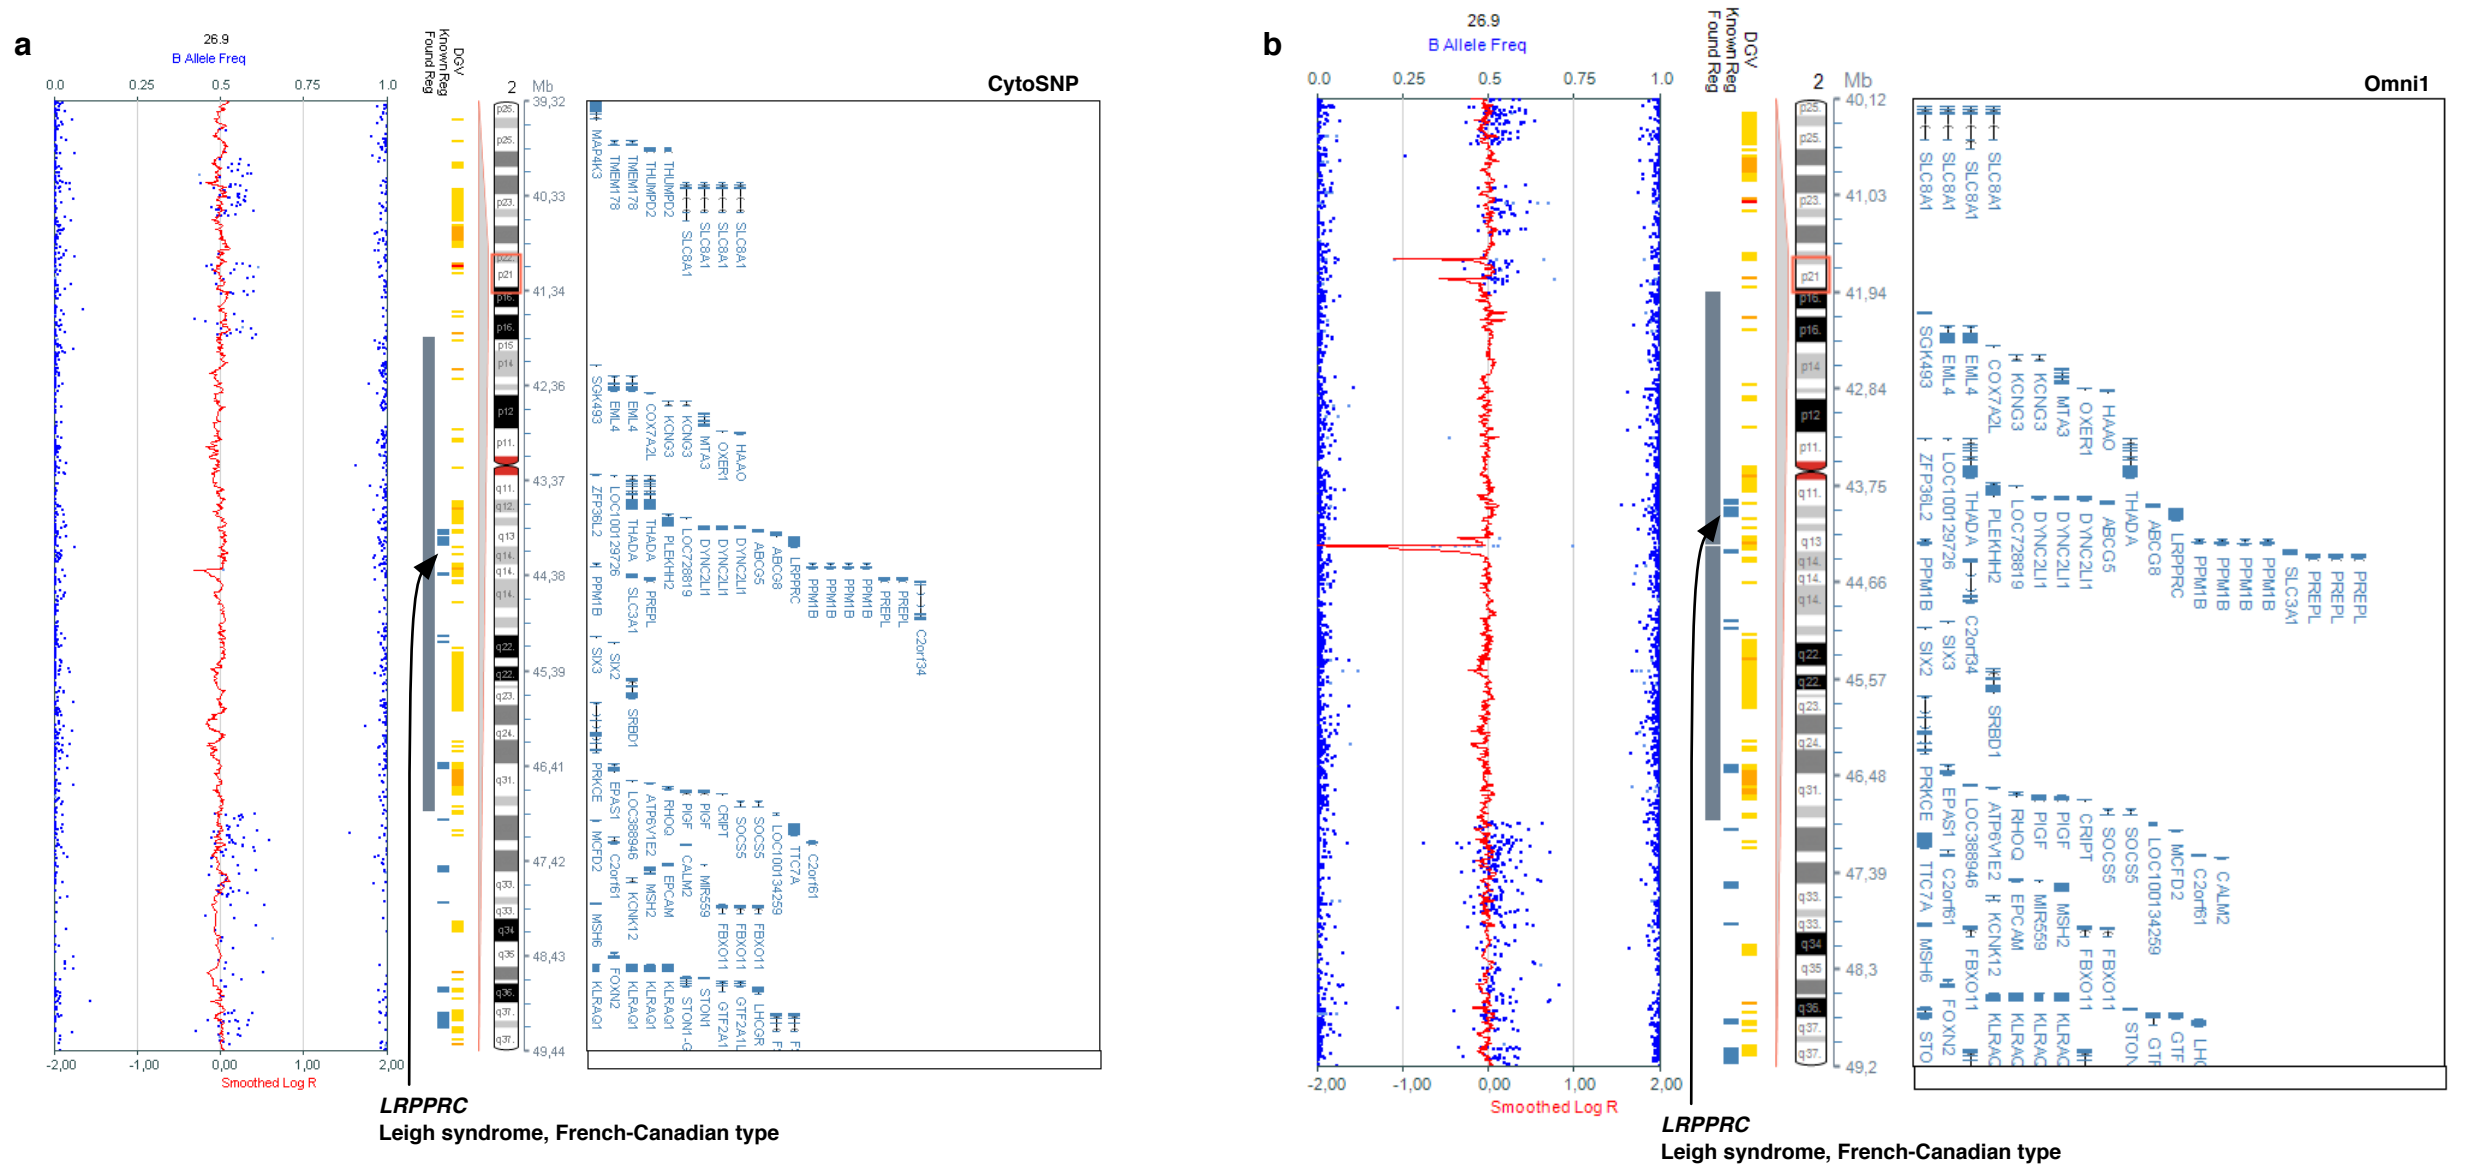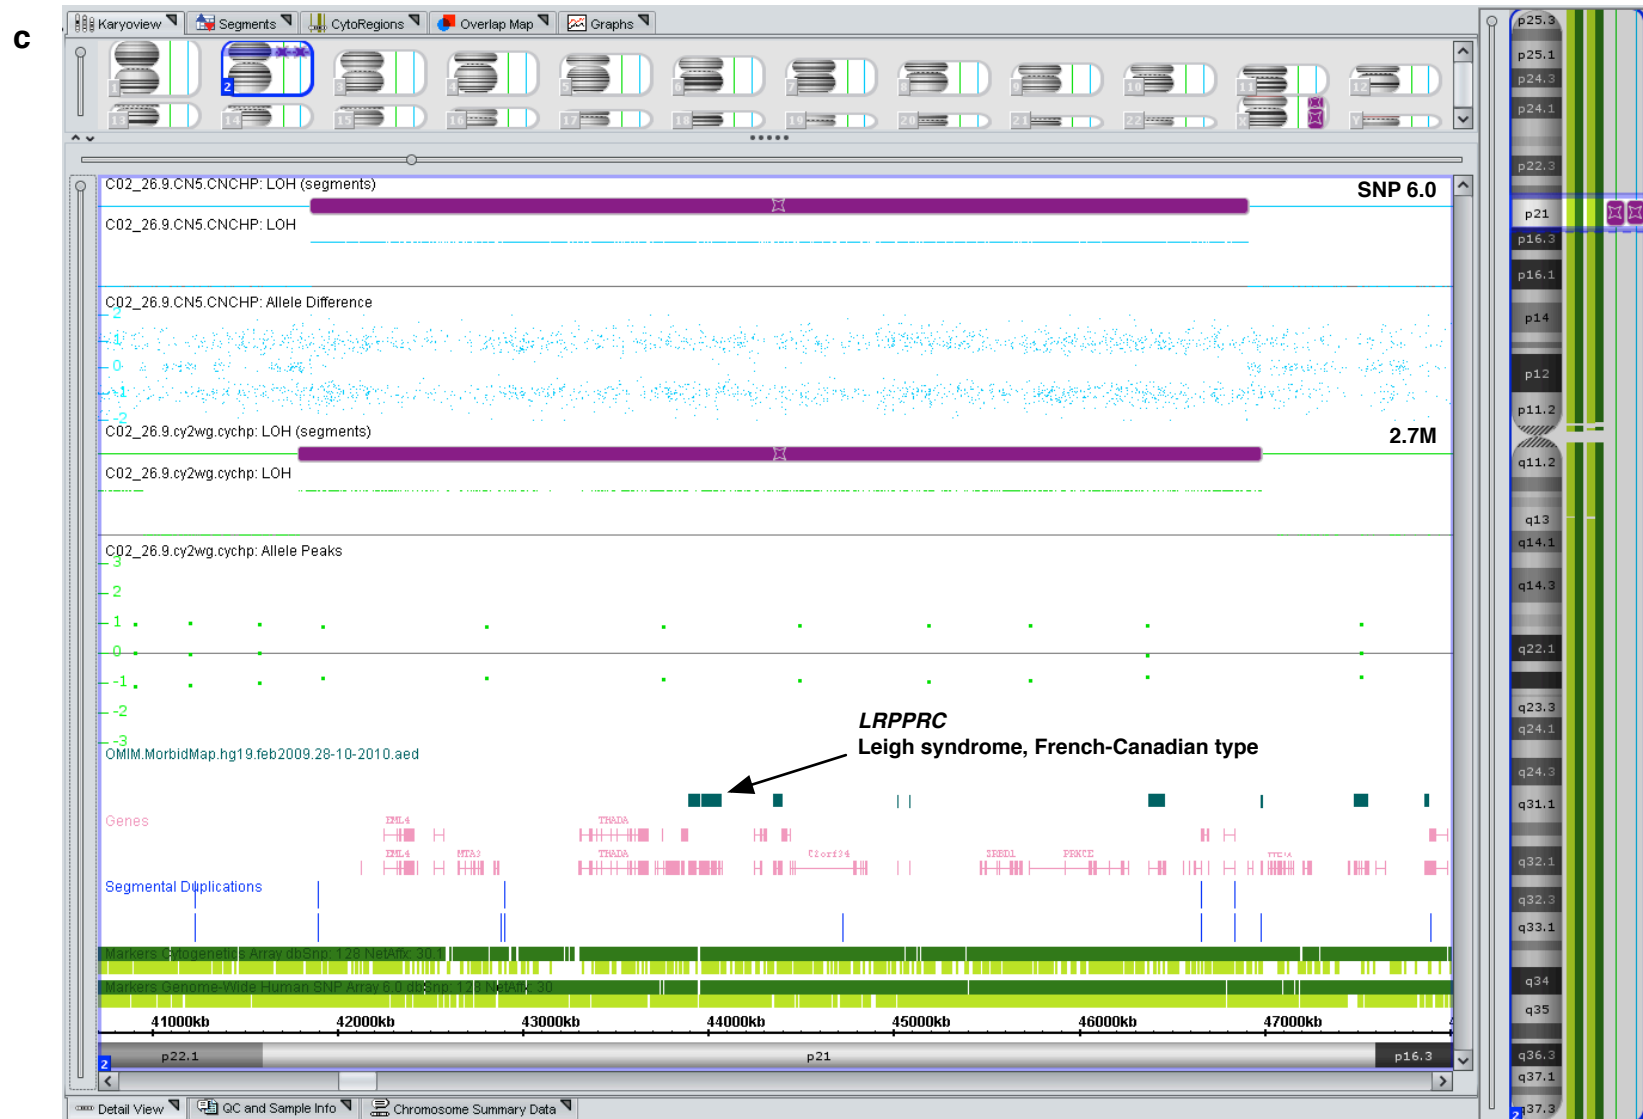

Supplement: 12920_2014_70_MOESM13_ESM.pdf [file 12920_2014_70_MOESM13_ESM.pdf]
